# Supplementary material for: Evaluating Deconvolution Methods Using Real Bulk RNA-expression Data for Robust Prognostic Insights in Pan-Cancer
Source: Research Square preprint supplement (doi:10.21203/rs.3.rs-6389993/v1), 2025-05-12
Supplement: Supplementary file 1 [file 96da70d3cebedf58e0d40678.docx]

**Supplementary Note 1 The formulas of Evaluation Metrics.**

***Scenario 1: Consistency with scRNA-seq***

Conservative Criteria:

|  | (1) |
| --- | --- |

|  | (2) |
| --- | --- |

|  | (3) |
| --- | --- |

Permissive Criteria (the calculation of recall in Permissive Criteria remains the same as in Conservative Criteria):

|  | (4) |
| --- | --- |

|  | (5) |
| --- | --- |

: DP cell types identified in both scRNA-seq data and deconvolution results

: DP cell type identified in deconvolution results but not in scRNA-seq data.

: DP cell type identified in scRNA-seq data but not in deconvolution results.

: DP cell types identified in deconvolution results that align with trends in scRNA-seq data.

: DP cell types identified in deconvolution results that opposite with trends in scRNA-seq data.

***Scenario 2: Reproducibility Across Cohorts***

Conservative Criteria:

|  | (6) |
| --- | --- |
|  | (7) |
|  | (8) |
|  | (9) |

Permissive Criteria (the calculation of recall in Permissive Criteria remains the same as in Conservative Criteria):

|  | (10) |
| --- | --- |
|  | (11) |
|  | (12) |

:DP cell types identified by deconvolution method in the first bulk cohort.

:DP cell types identified by deconvolution method in the second bulk cohort.

: DP cell types identified by deconvolution method in the first bulk cohort and exhibit consistent trend with the second bulk cohort.

DP cell types identified by deconvolution method in the second bulk cohort and exhibit consistent trend with the first bulk cohort.

: DP cell types identified in scRNA-seq data.

***Scenario 3: Prognostic Relevance***

Conservative Criteria:

|  | (13) |
| --- | --- |

Permissive Criteria:

|  | (14) |
| --- | --- |

: PR cell types identified by deconvolution method in the first bulk cohort.

:PR cell types identified by deconvolution method in the second bulk cohort.

PR cell types identified by deconvolution method in the first bulk cohort and exhibit consistent trend with the second bulk cohort.

PR cell types identified by deconvolution method in the second bulk cohort and exhibit consistent trend with the first bulk cohort.

**Figure Legends**

Supplementary Figure 1: The proportion of dendritic cells in TCGA-COAD.

Supplementary Figure 2: The consistency between the DP cell types identified by the deconvolution methods and the scRNA-seq standard. For PRAD, both recall and conservative precision are 0 due to the absence of scRNA-seq DP cell type. (A) Recall. (B) Conservative precision. (C) Permissive precision.

Supplementary Figure 3: The number of shared DP cell types identified in two cohorts across six methods in eight cancers. (A) Conservative number. (B) Conservative number.

Supplementary Figure 4: The reproducibility of DP cell types identified in two cohorts across six methods in eight cancers. (A) Conservative recall. (B) Conservative precision. (C) Permissive recall. (D) Permissive precision.

Supplementary Figure 5: The association of mCAF and cDC_CLEC9A with prognosis across 12 cancer entities. (A) The association of mCAF with prognosis across 12 cancer entities. (B) The association of cDC_CLEC9A with prognosis across 12 cancer entities.

Supplementary Figure 6: Kaplan-Meier curves for ReCIDE (ASC% - mCAF%), BayesPrism (Mast_KIT% + cDC_CLEC9A%), and BayesPrism (Hypoxia% + cDC_CLEC9A%) prognostic indicator in GEO cohorts. (A) Kaplan-Meier curves for ReCIDE (ASC% - mCAF%) prognostic indicator in GEO cohorts. (B) Kaplan-Meier curves for BayesPrism (Mast_KIT% + cDC_CLEC9A%) prognostic indicator in GEO cohorts. (C) Kaplan-Meier curves for BayesPrism (Hypoxia% + cDC_CLEC9A%) prognostic indicator in GEO cohorts.


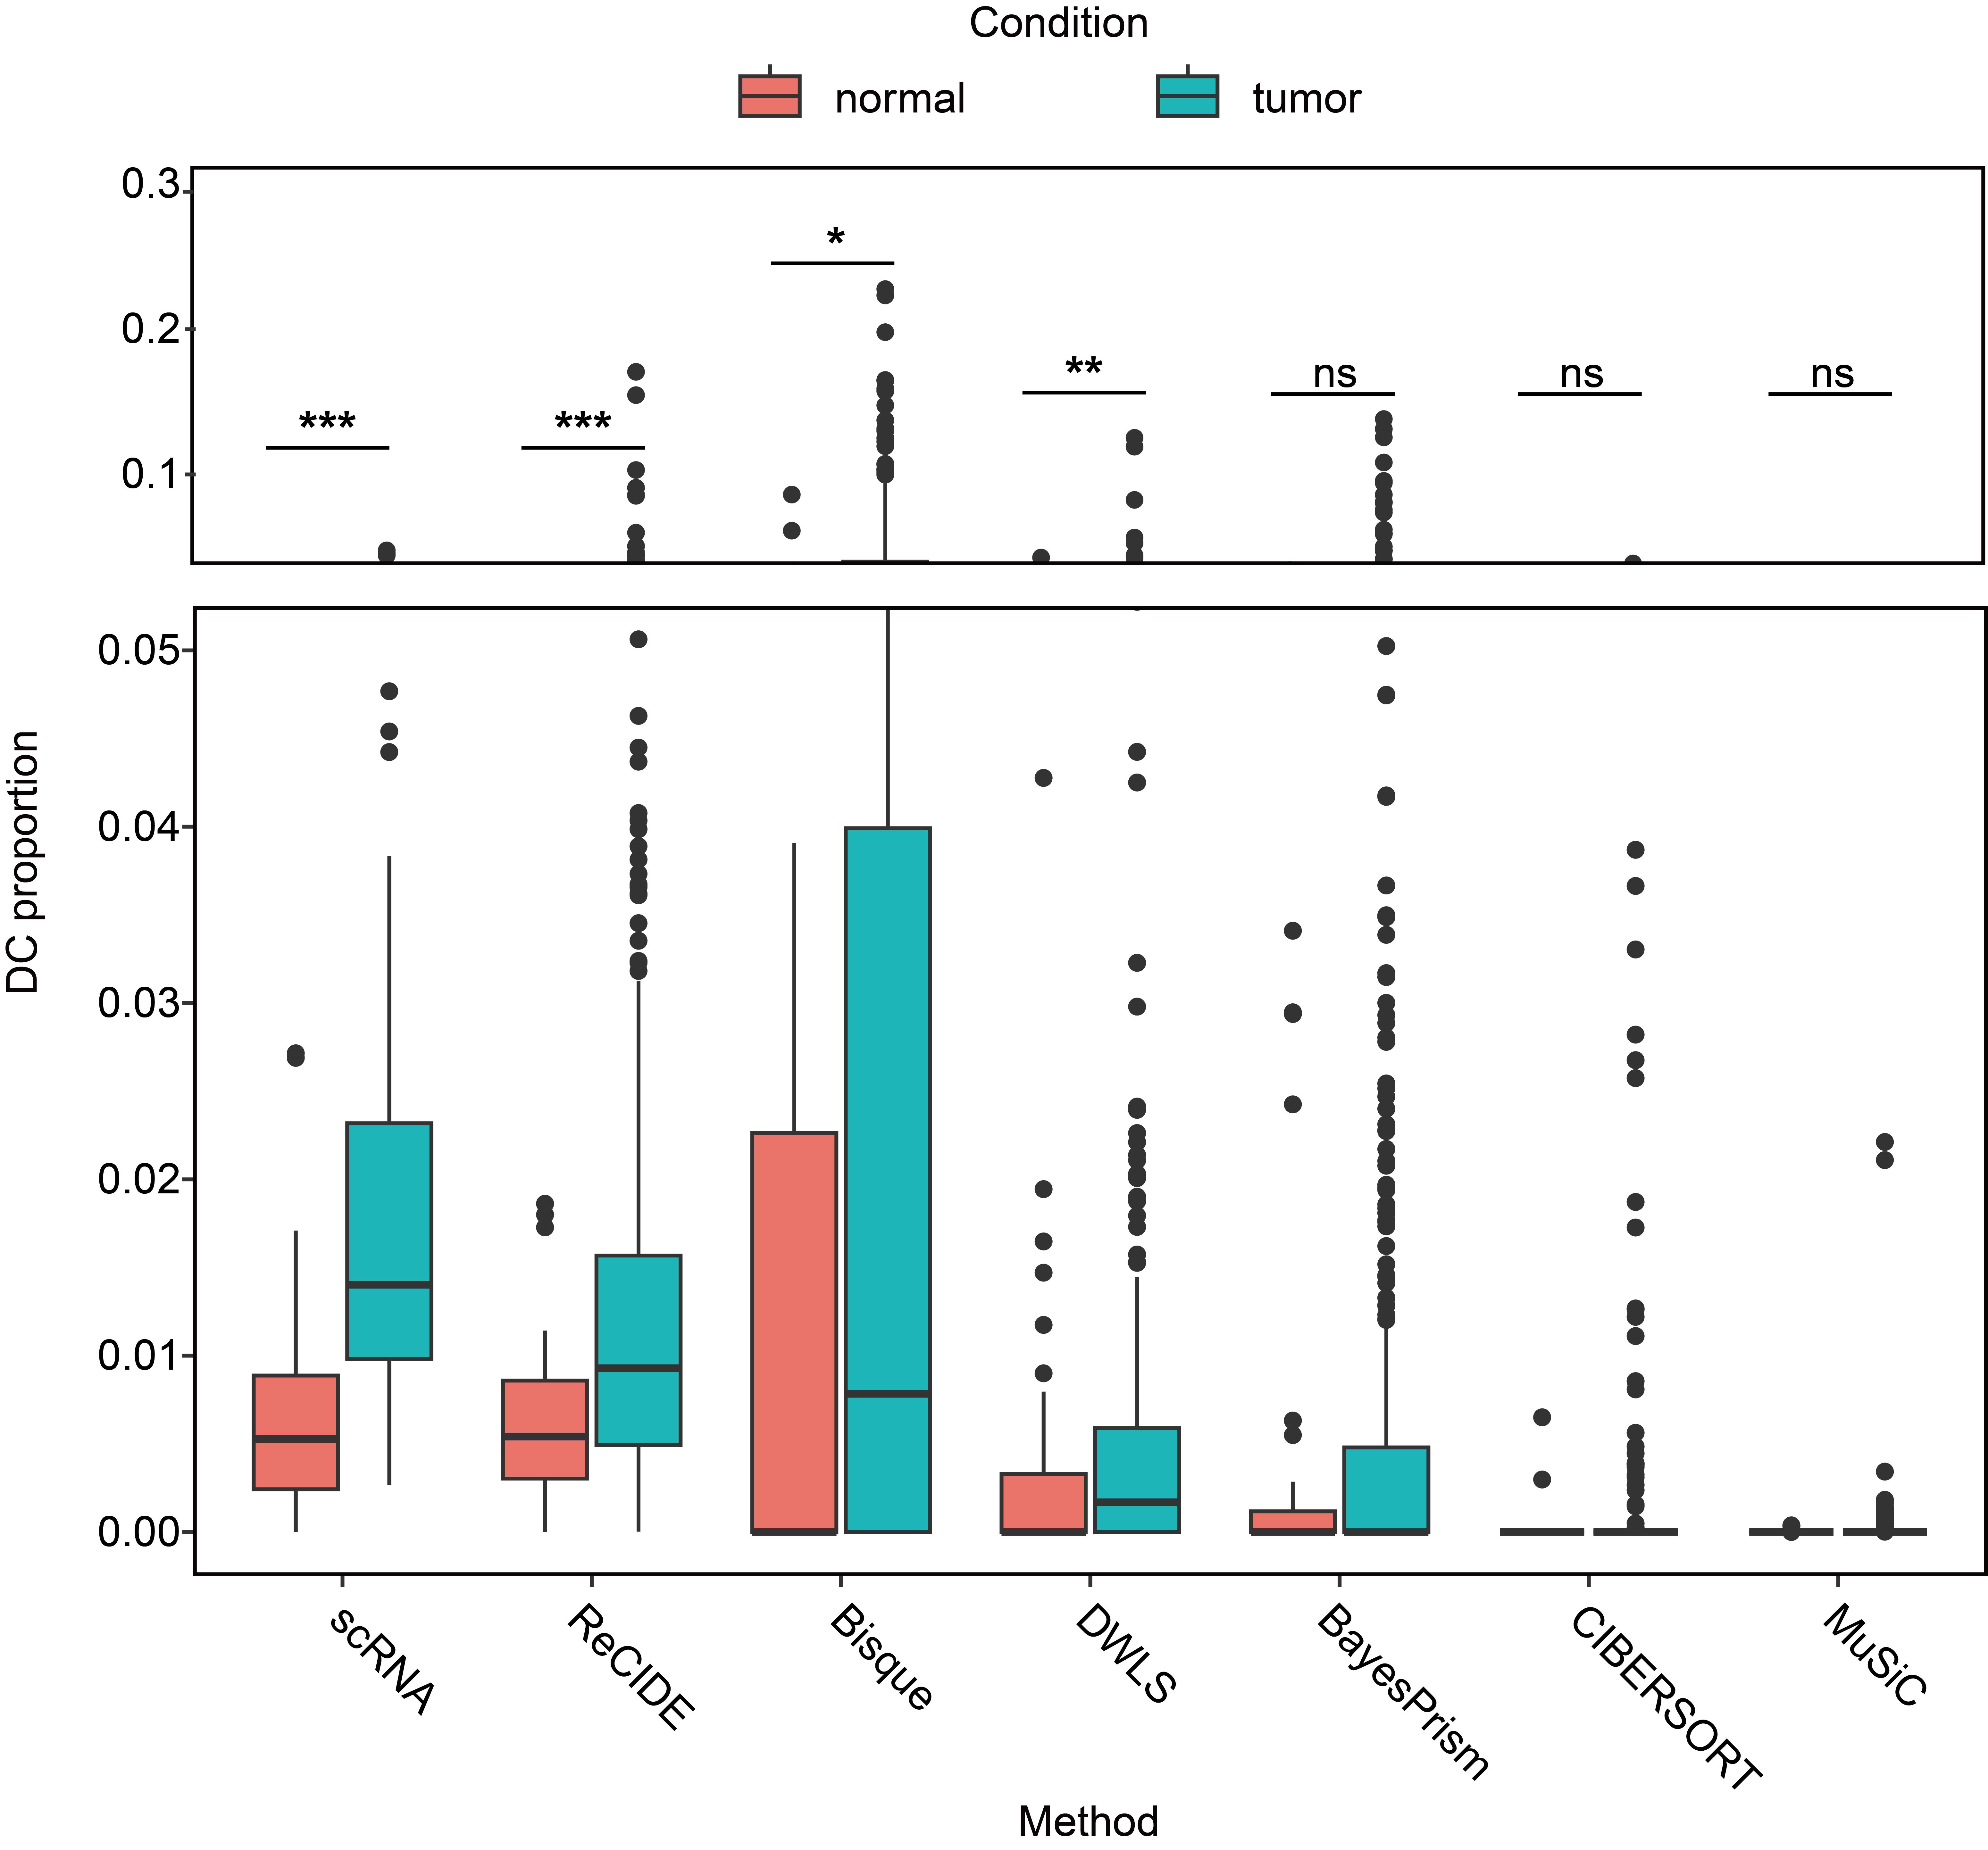


Supplementary Figure 1: The proportion of dendritic cells in TCGA-COAD.


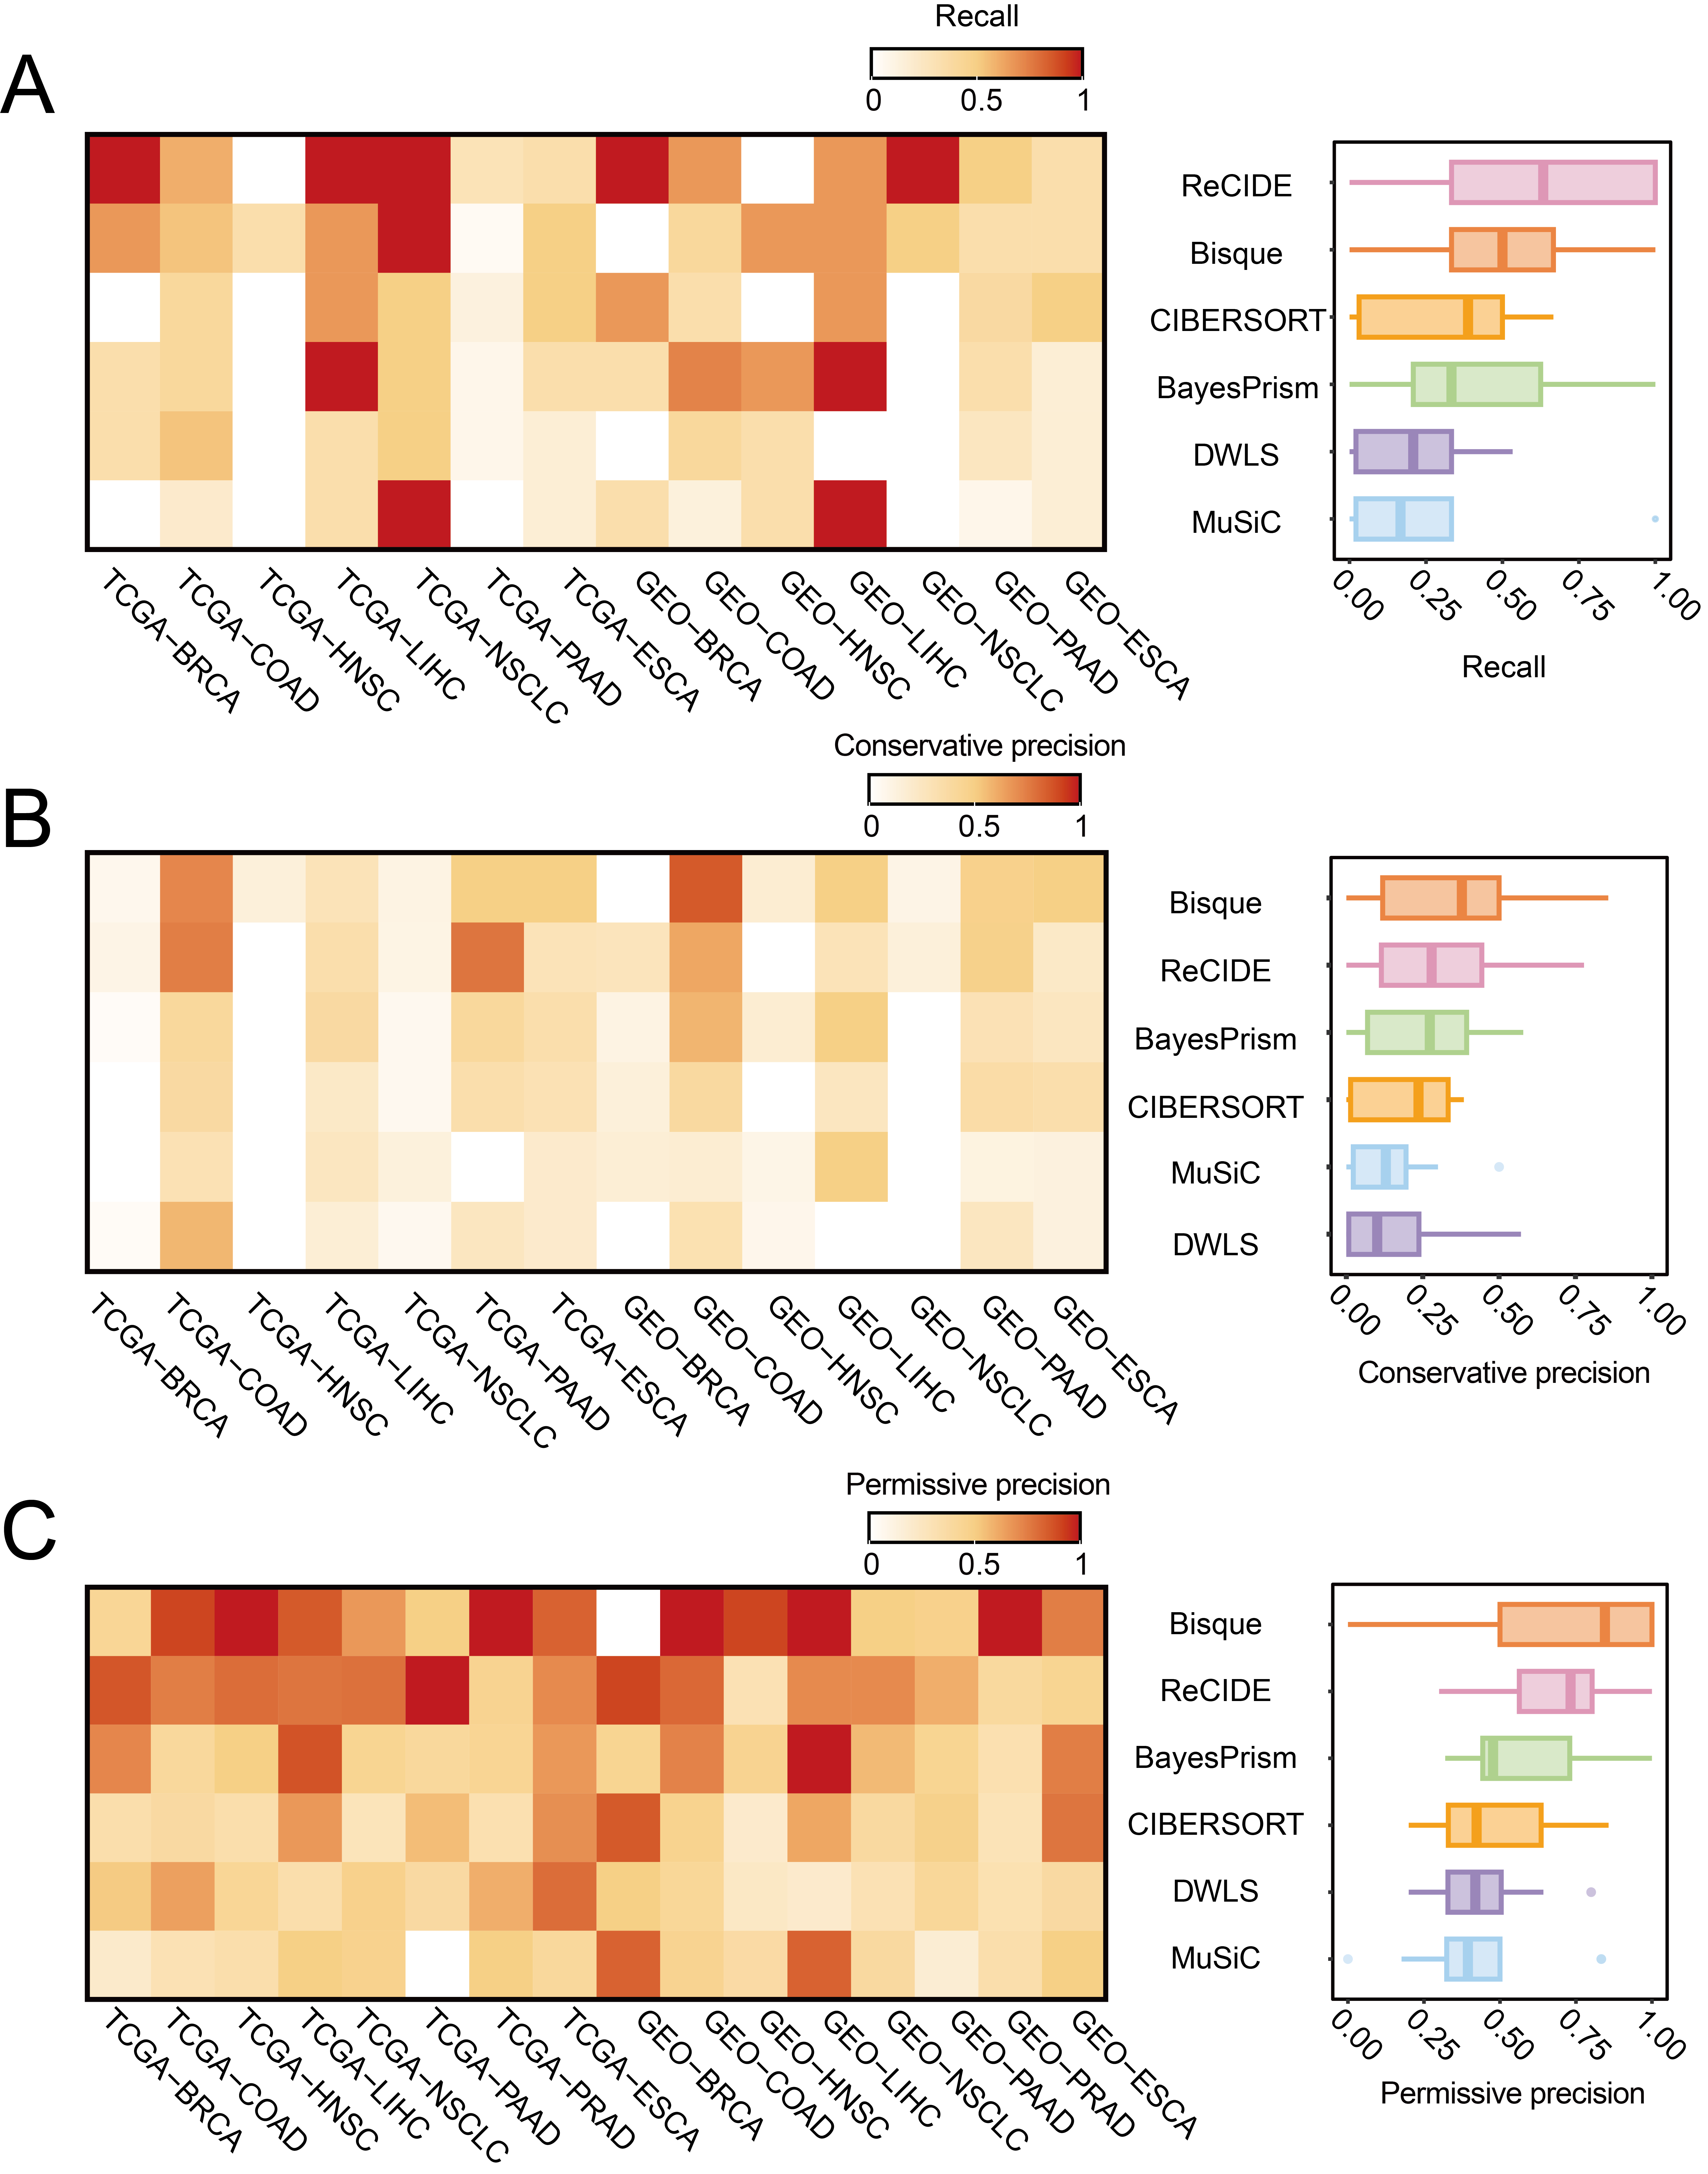


Supplementary Figure 2: The consistency between the DP cell types identified by the deconvolution methods and the scRNA-seq standard. For PRAD, both recall and conservative precision are 0 due to the absence of scRNA-seq DP cell type. (A) Recall. (B) Conservative precision. (C) Permissive precision.


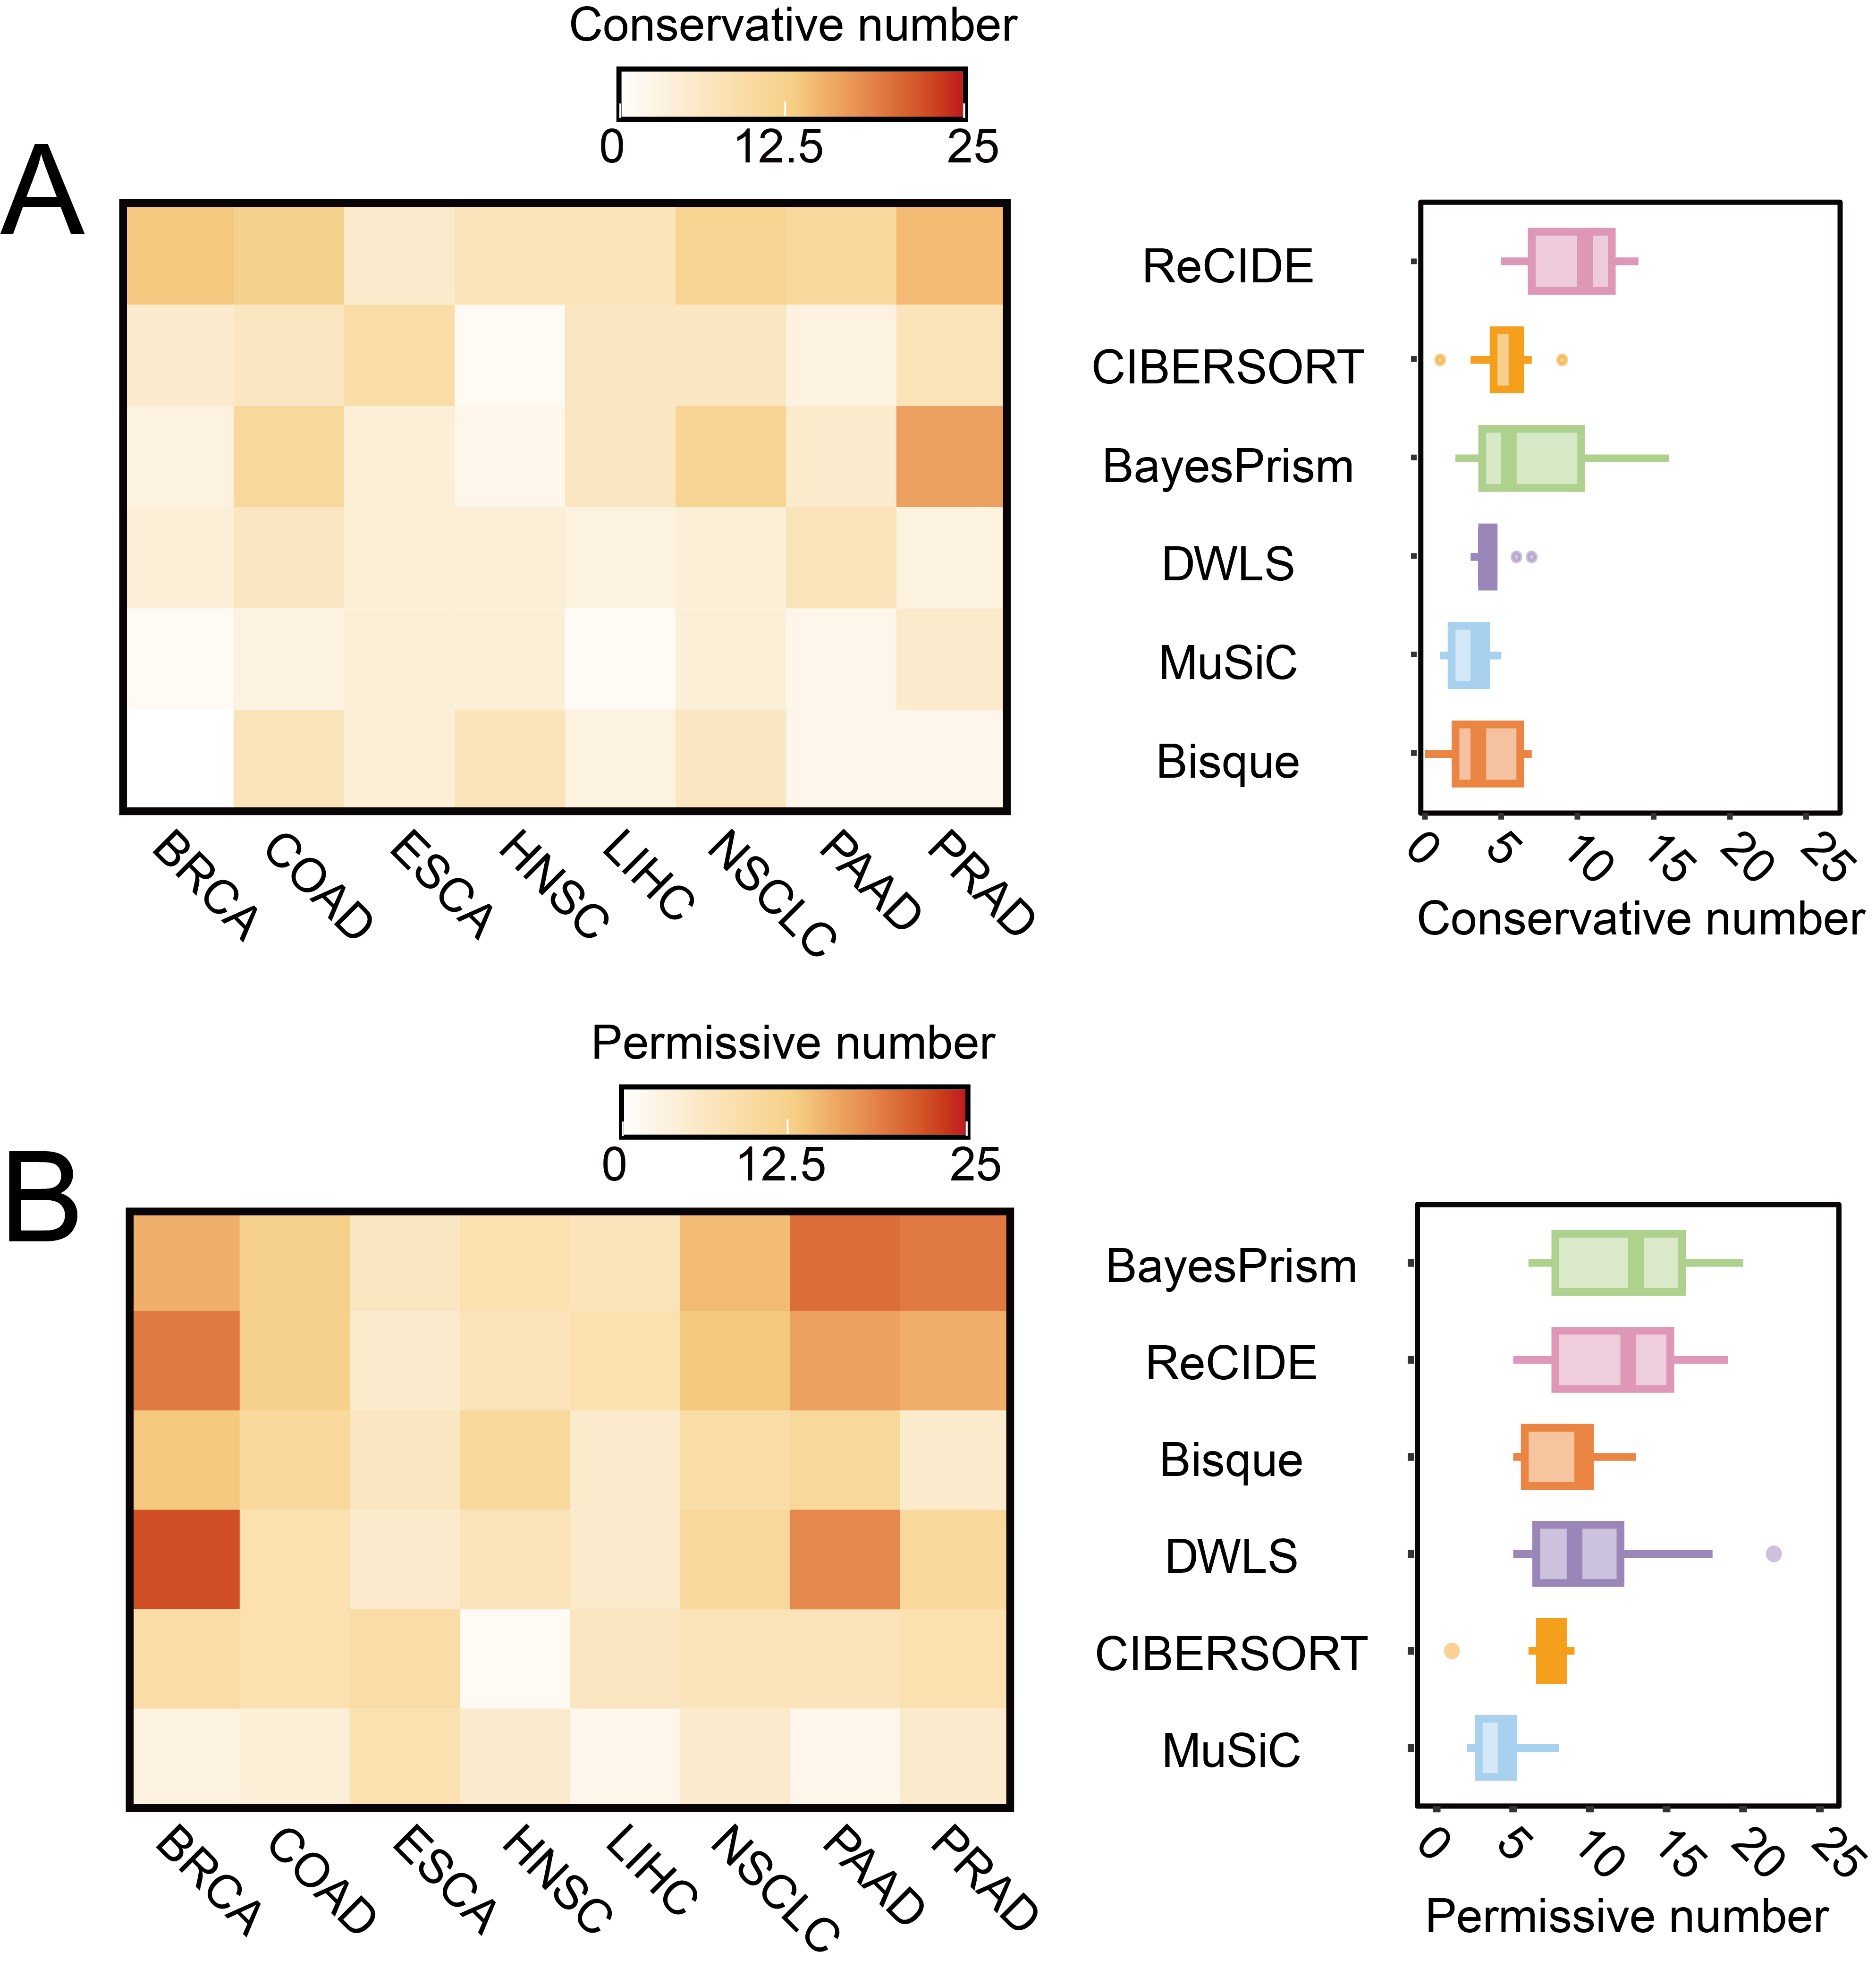


Supplementary Figure 3: The number of shared DP cell types identified in two cohorts across six methods in eight cancers. (A) Conservative number. (B) Conservative number.


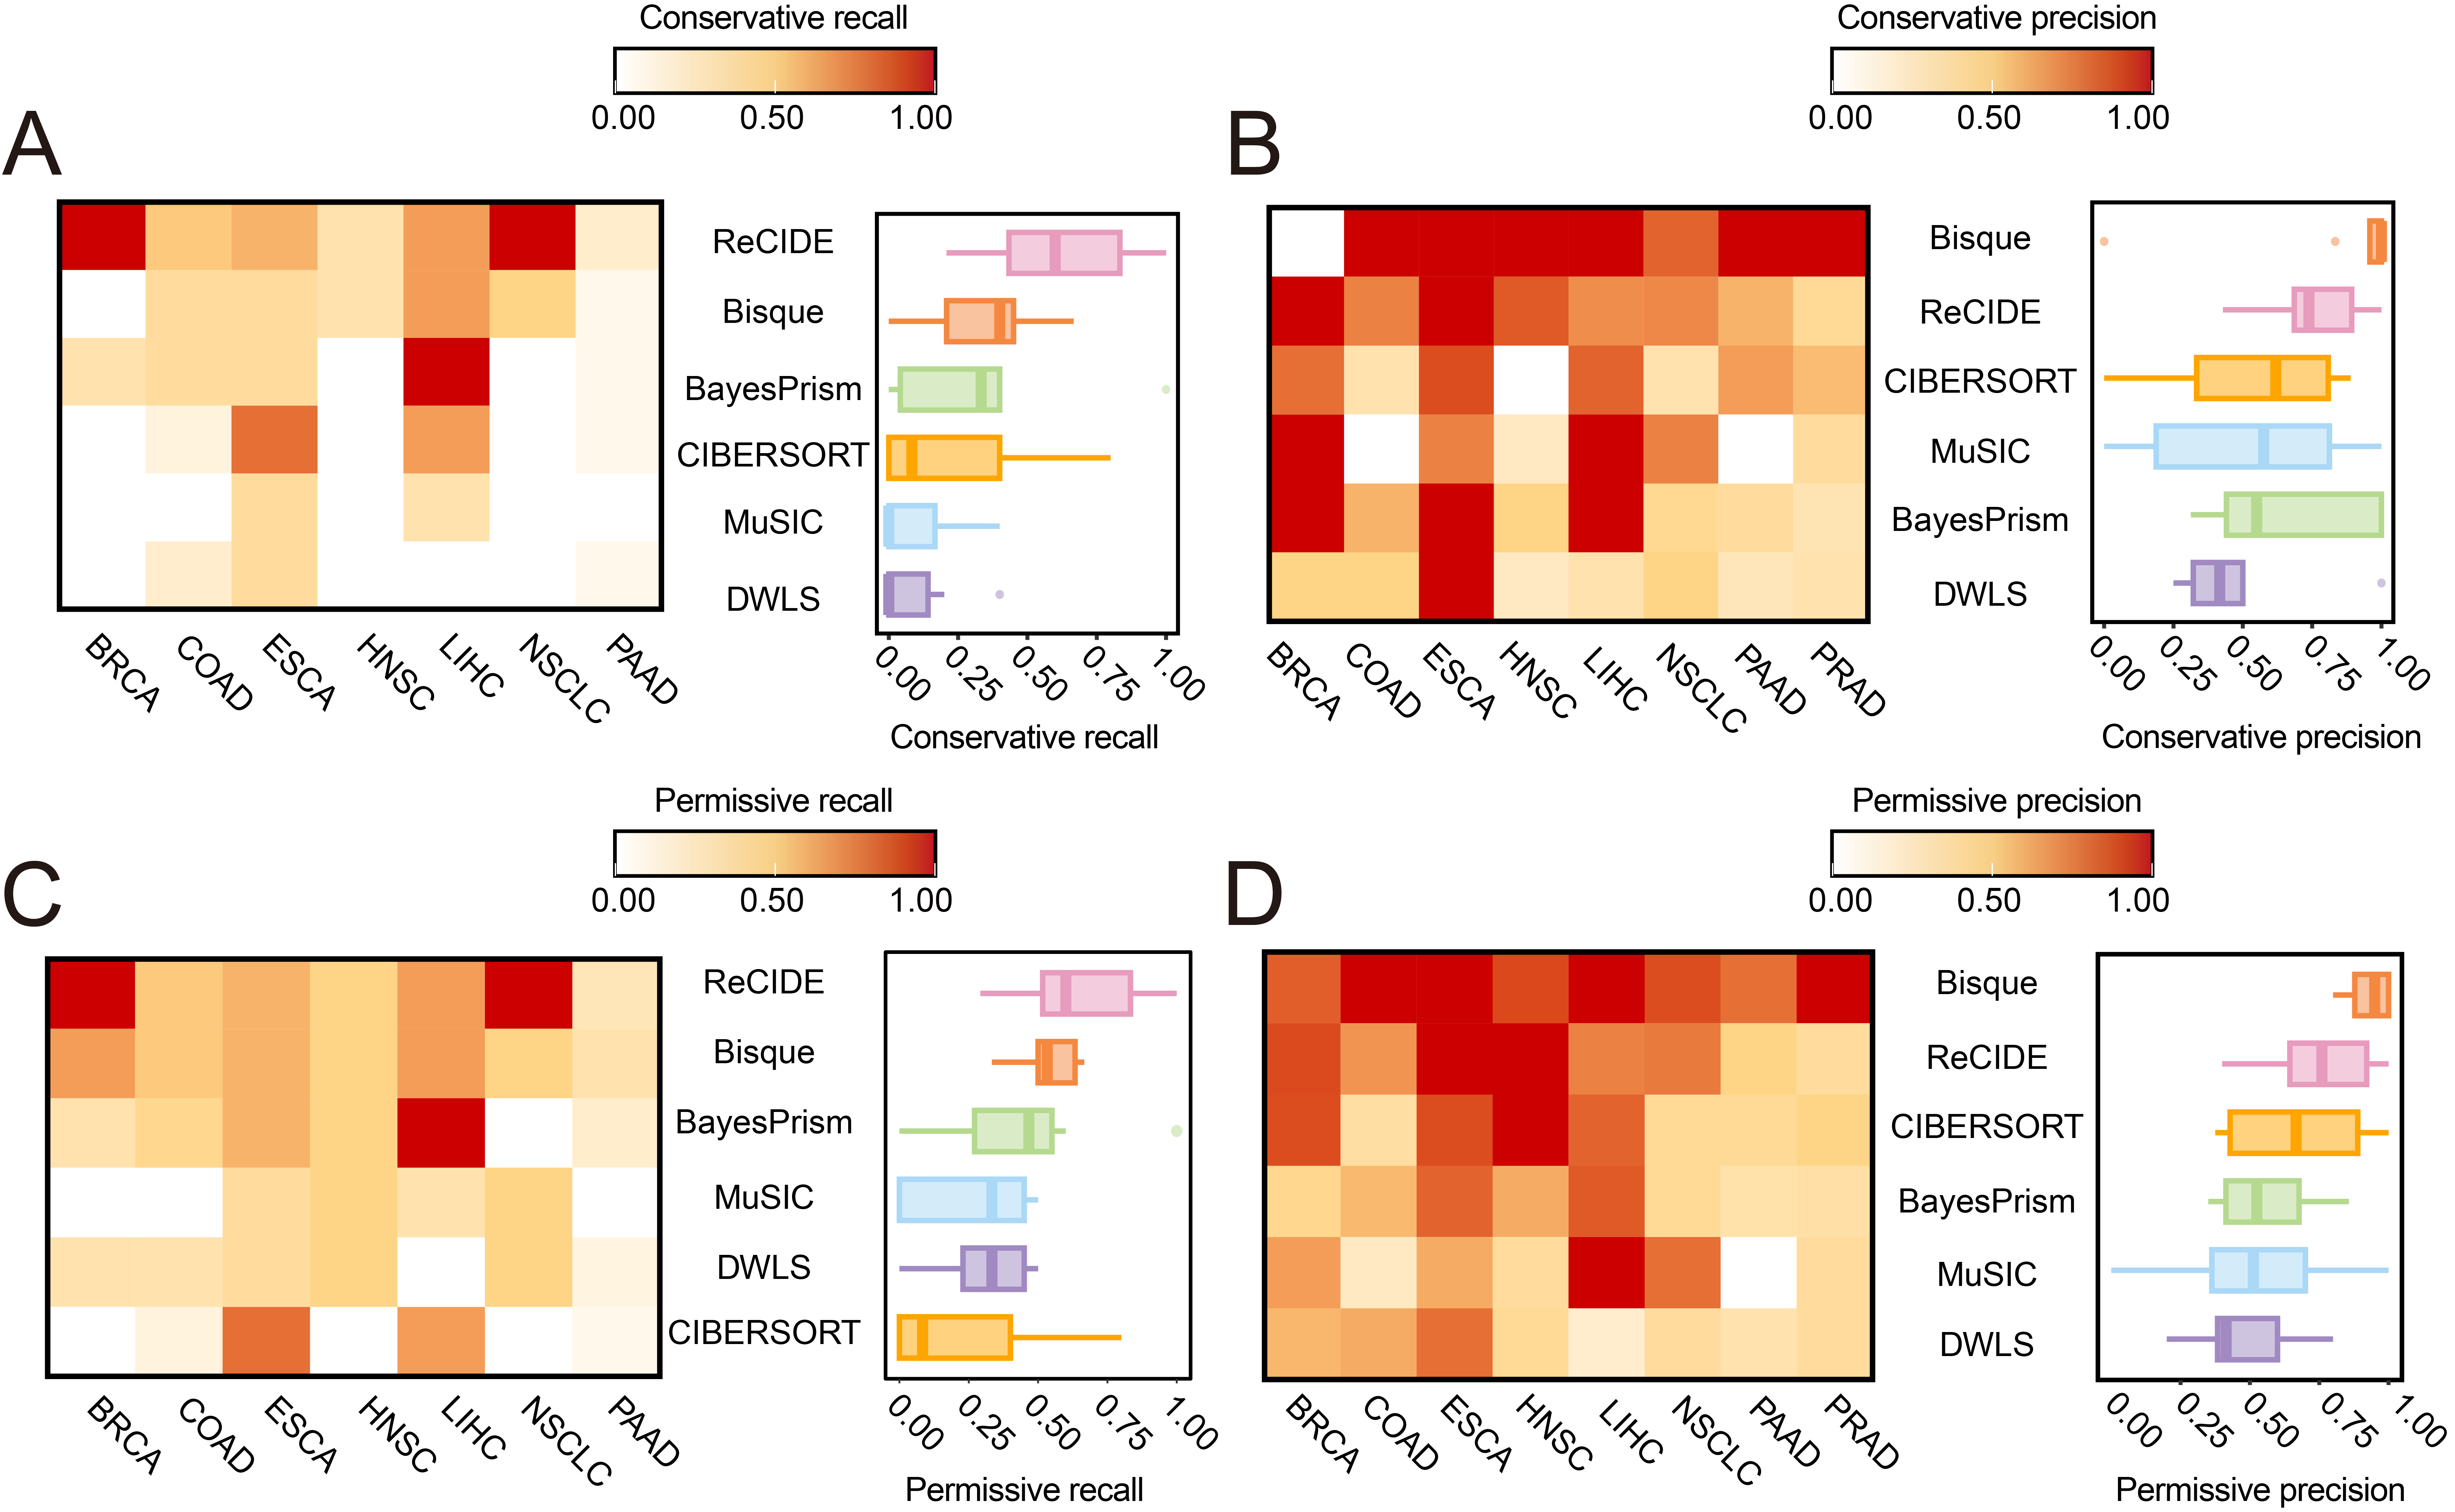


Supplementary Figure 4: The reproducibility of DP cell types identified in two cohorts across six methods in eight cancers. (A) Conservative recall. (B) Conservative precision. (C) Permissive recall. (D) Permissive precision.


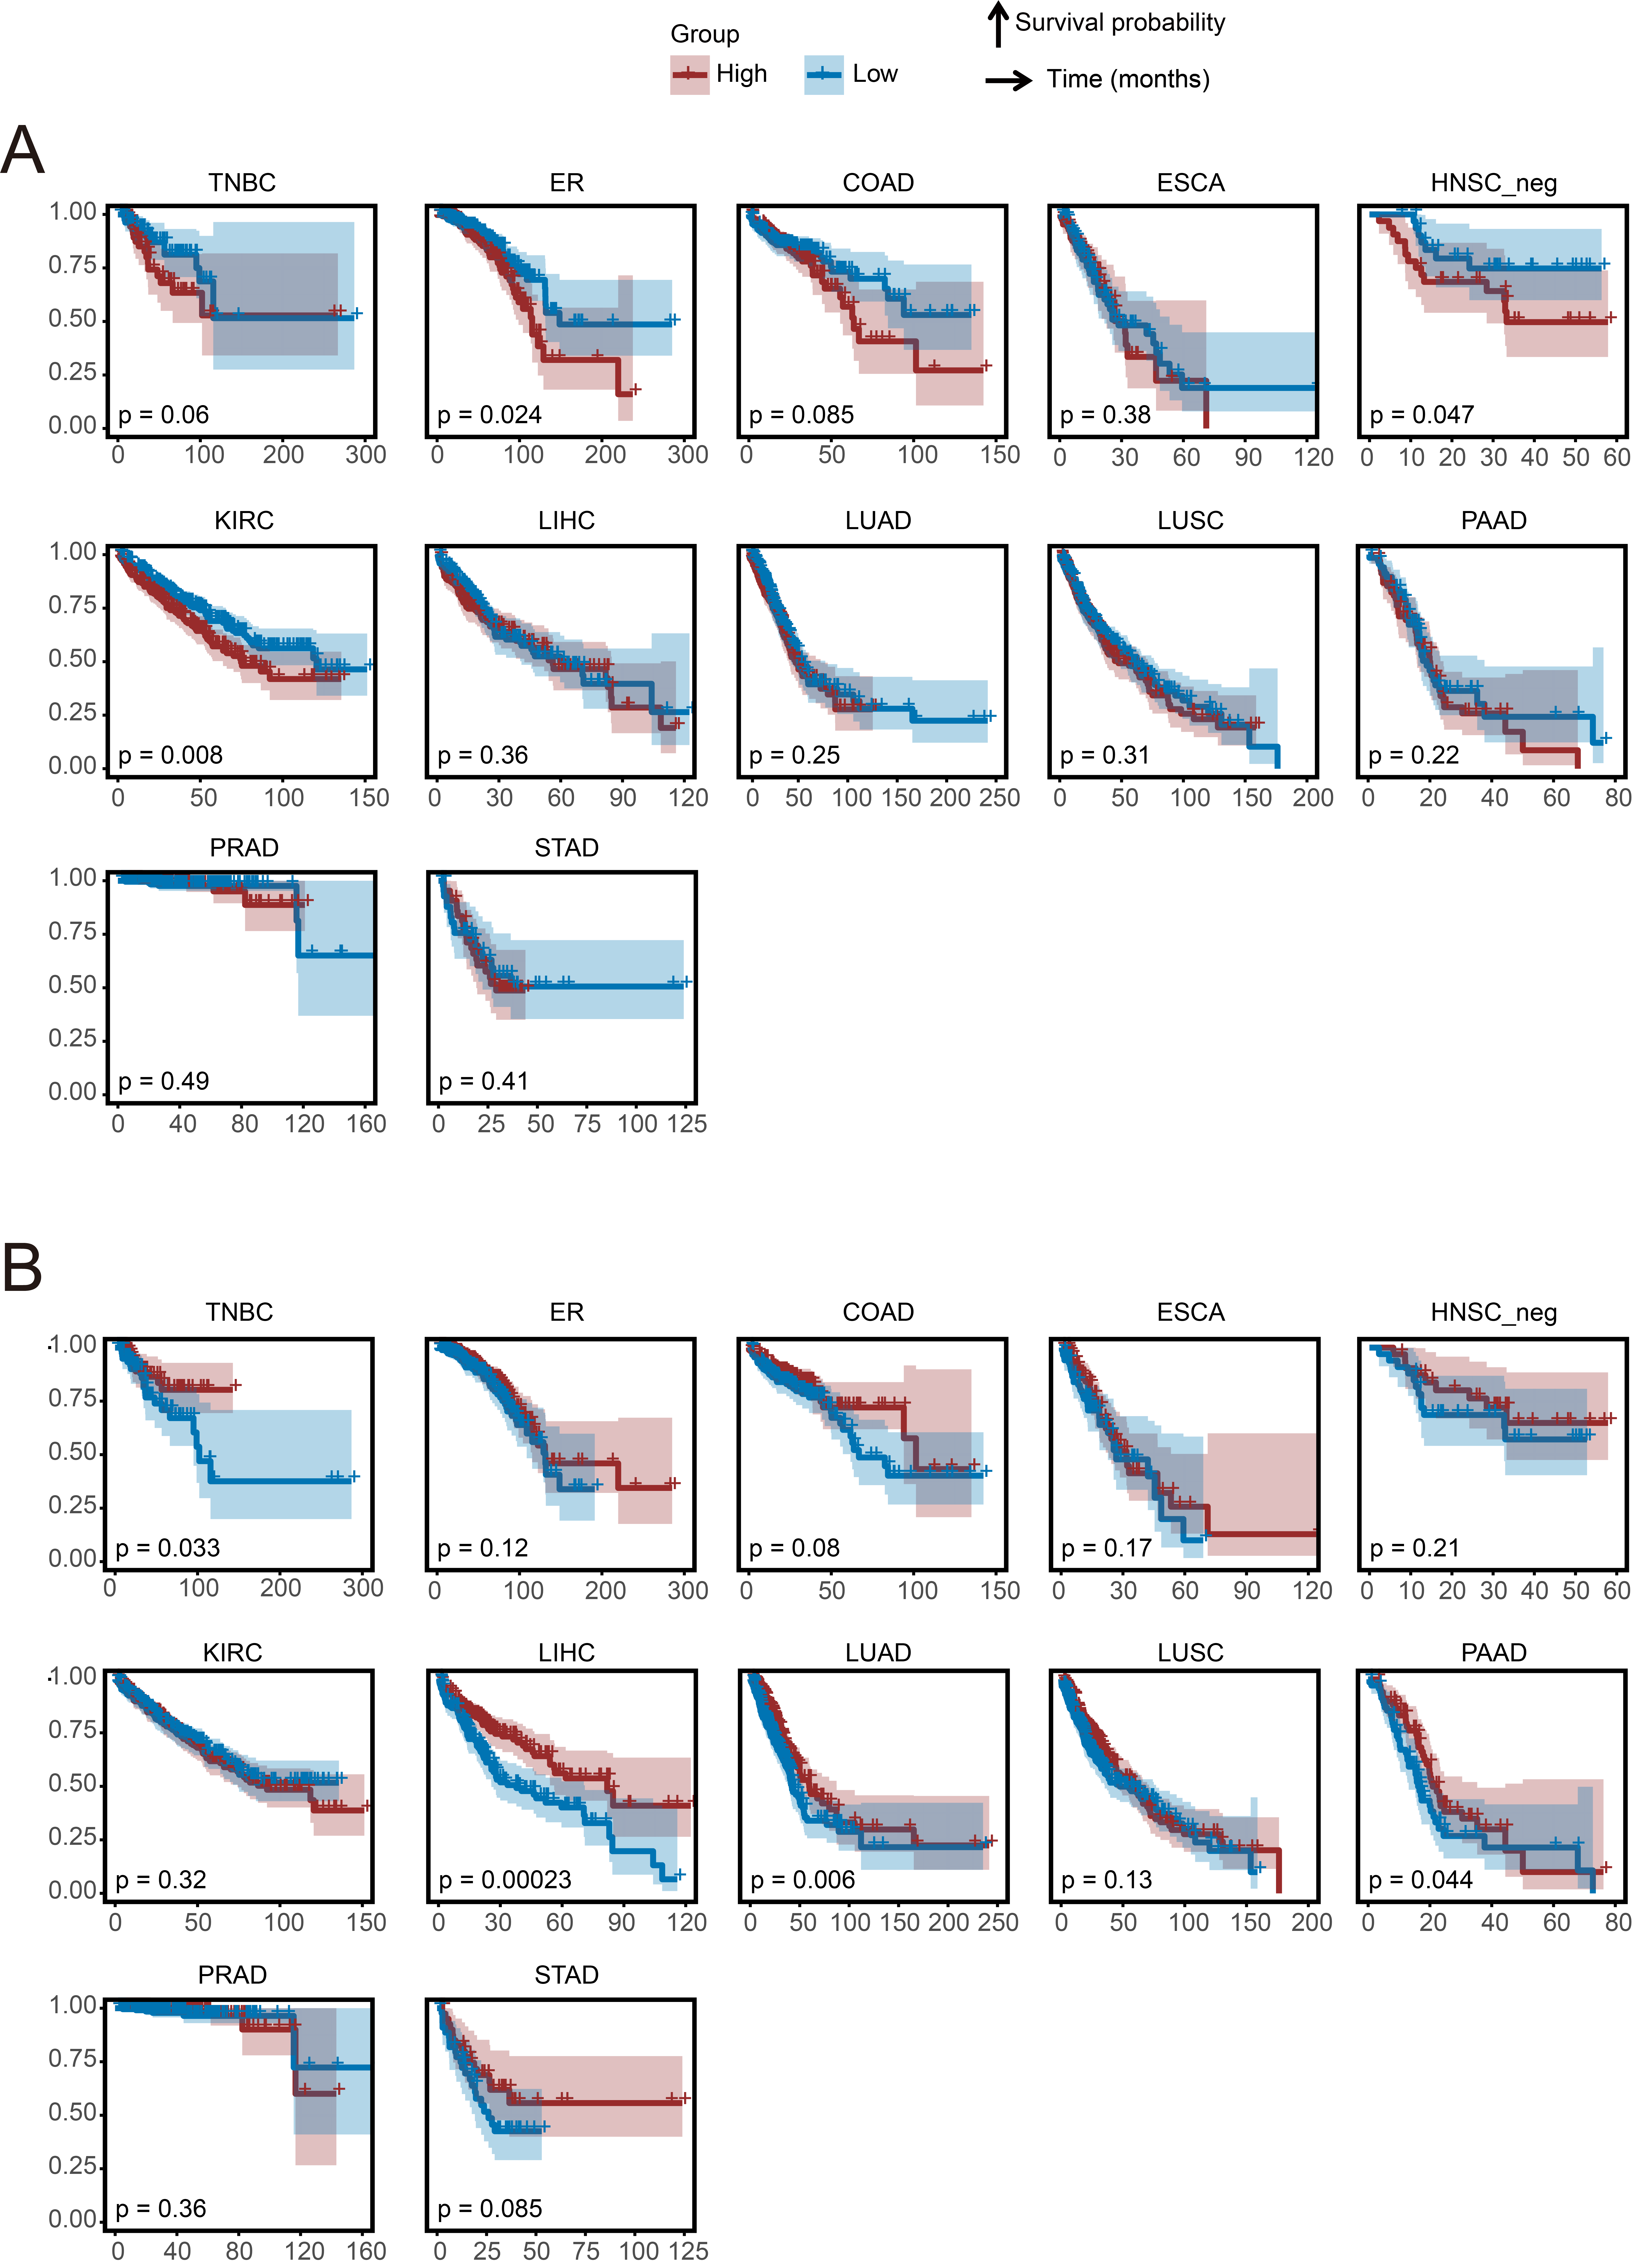


Supplementary Figure 5: The association of mCAF and cDC_CLEC9A with prognosis across 12 cancer entities. (A) The association of mCAF with prognosis across 12 cancer entities. (B) The association of cDC_CLEC9A with prognosis across 12 cancer entities.


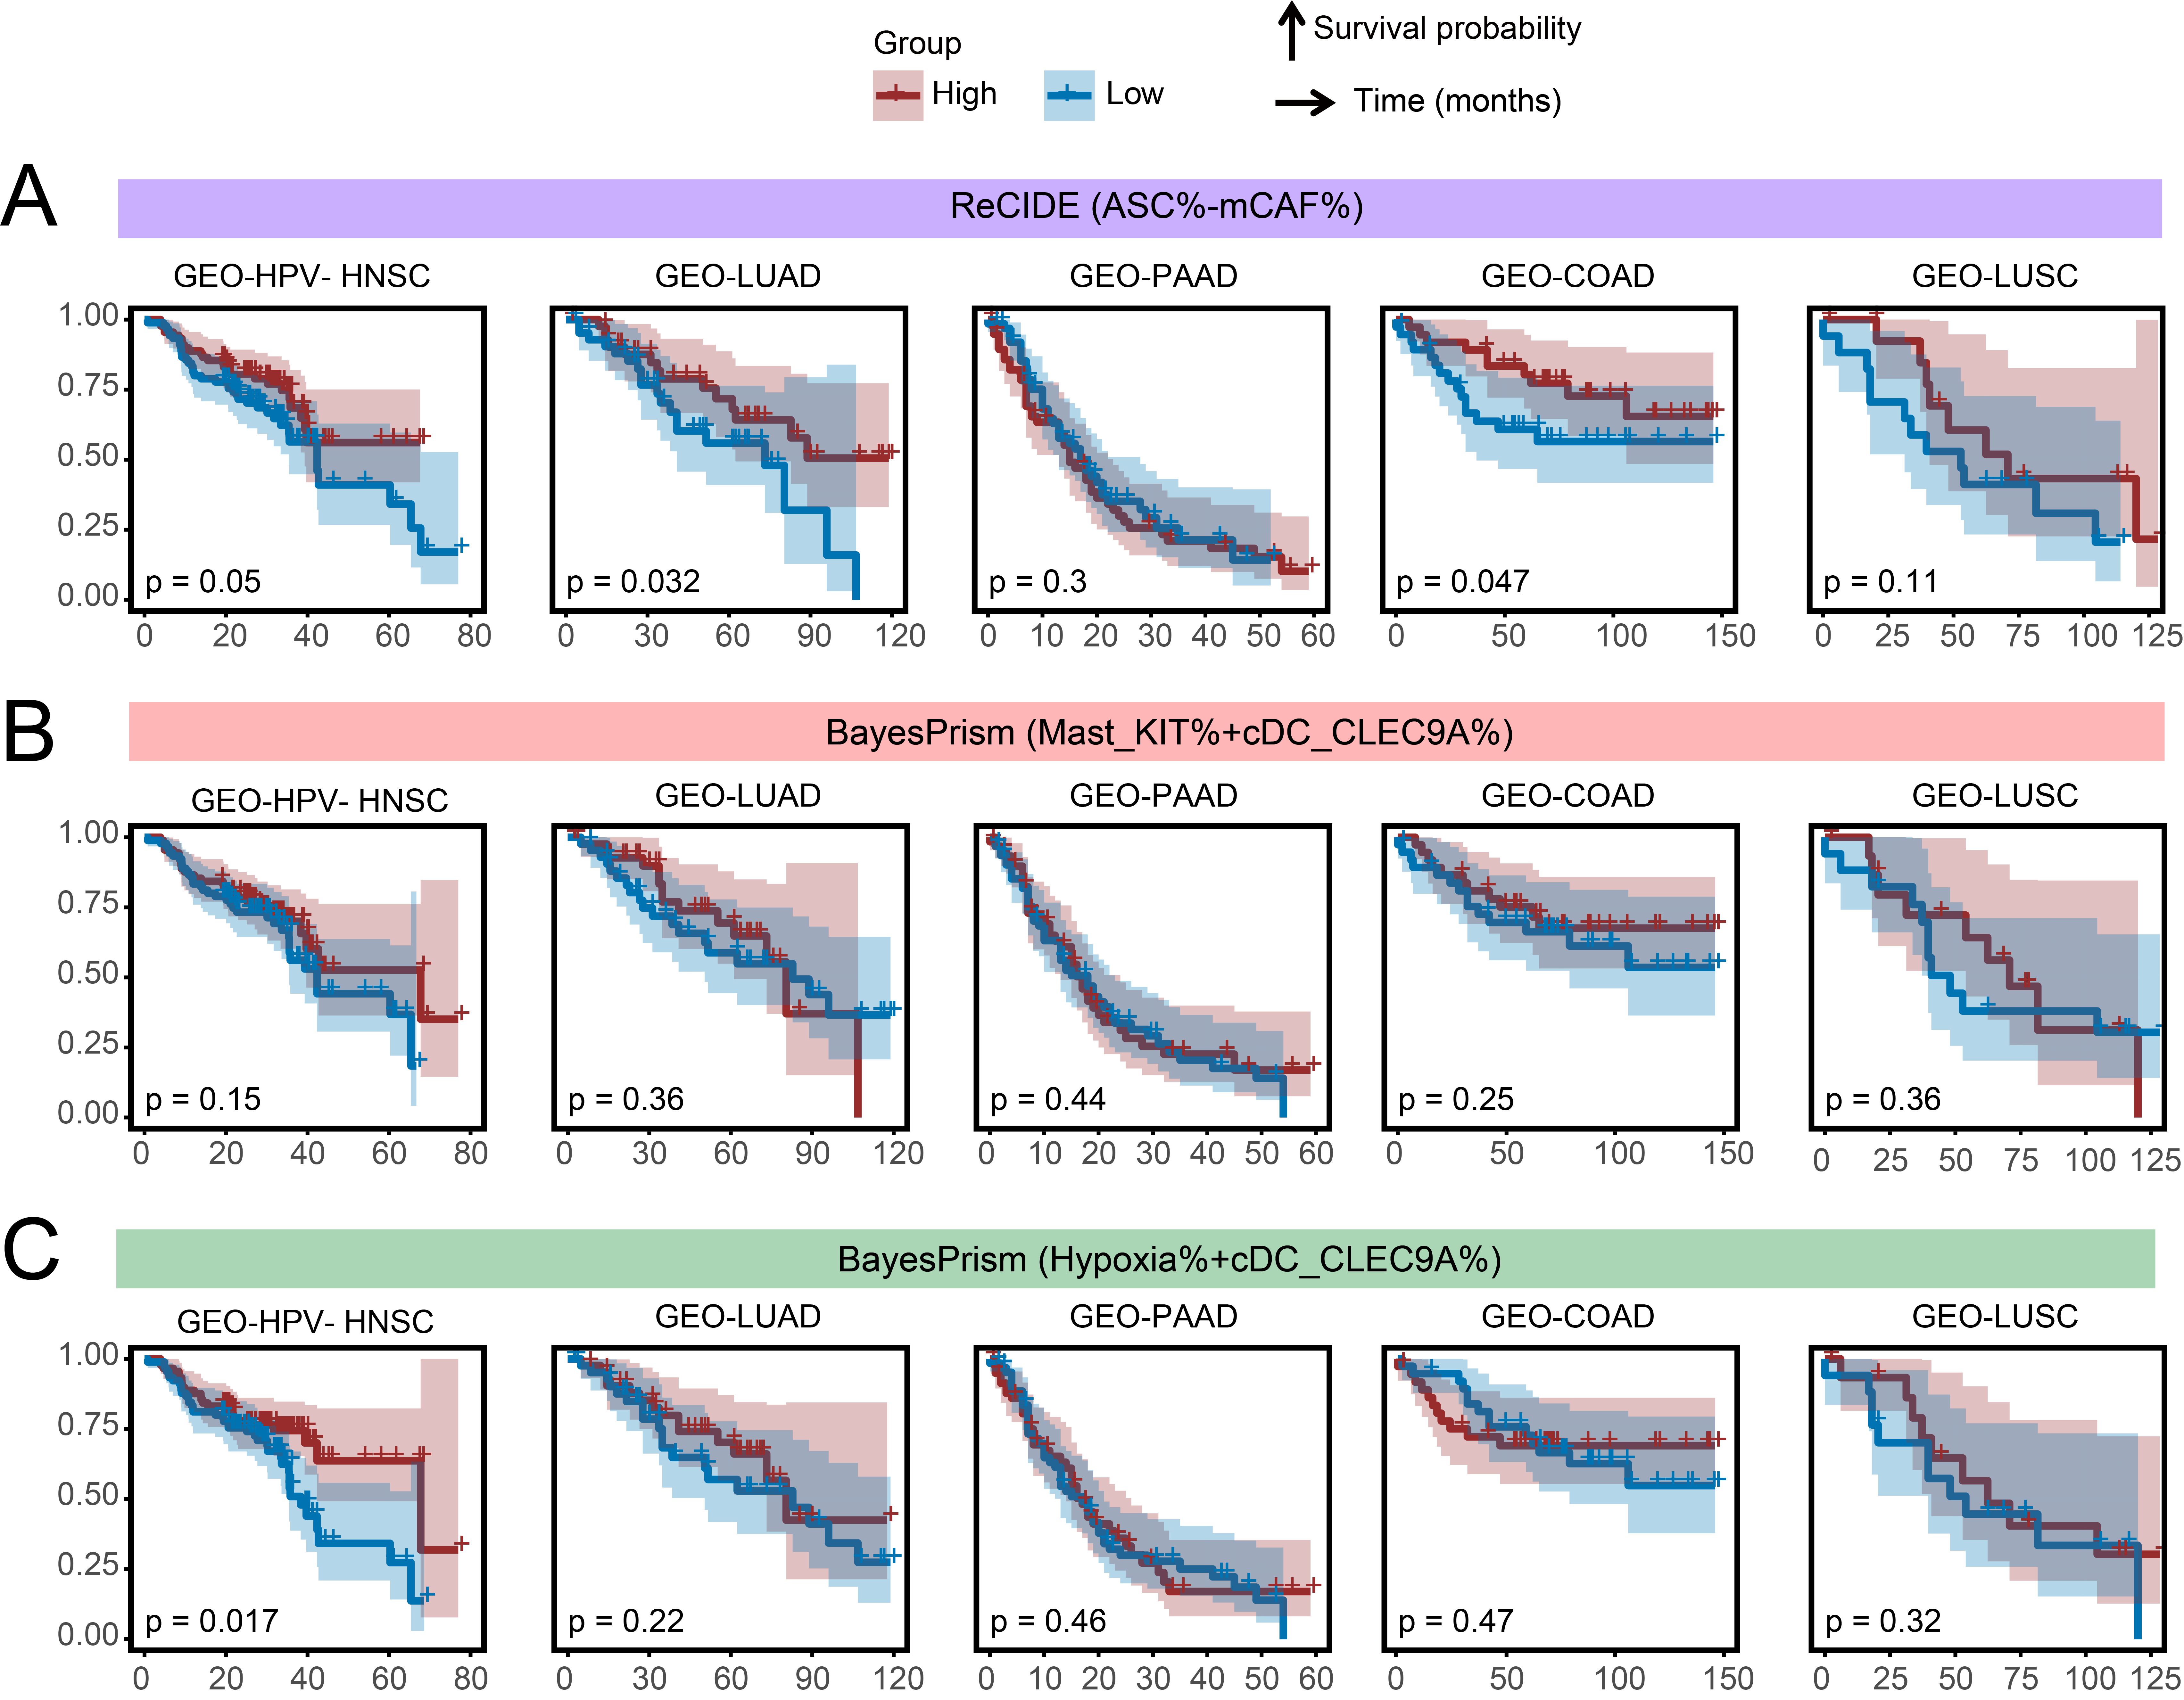


Supplementary Figure 6: Kaplan-Meier curves for ReCIDE (ASC% - mCAF%), BayesPrism (Mast_KIT% + cDC_CLEC9A%), and BayesPrism (Hypoxia% + cDC_CLEC9A%) prognostic indicator in GEO cohorts. (A) Kaplan-Meier curves for ReCIDE (ASC% - mCAF%) prognostic indicator in GEO cohorts. (B) Kaplan-Meier curves for BayesPrism (Mast_KIT% + cDC_CLEC9A%) prognostic indicator in GEO cohorts. (C) Kaplan-Meier curves for BayesPrism (Hypoxia% + cDC_CLEC9A%) prognostic indicator in GEO cohorts.
